# Supplementary material for: Robust Adaptive Pathways for Long-Term Flood Control in Delta Cities: Addressing Pluvial Flood Risks under Future Deep Uncertainty
Source: Copernicus journal article supplement (doi:10.5194/hess-2024-391), 2025-01-17
Supplement: Supplementary file [file hess-2024-391-RC1-supplement.pdf]

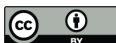

1     **Robust Adaptive Pathways for Long-Term Flood Control in Delta**  
2             **Cities: Addressing Pluvial Flood Risks under Future Deep**  
3                     **Uncertainty**

4             **Hengzhi Hu<sup>1,2</sup>, Qian Ke<sup>3</sup>, Wei Wu<sup>2</sup>, Min Zhang<sup>4</sup>, Jiahong Wen<sup>4\*</sup>**

6     <sup>1</sup>Department of Hospitality Management, Shanghai Business School, Shanghai 200234,  
7     China

8     <sup>2</sup>Key Laboratory of Cities' Mitigation and Adaptation To Climate Change in Shanghai,  
9     China Meteorological Administration, Shanghai 200030, China

10    <sup>3</sup>Institute for Housing and Urban Development Studies (IHS), Erasmus University  
11    Rotterdam, Rotterdam 3062 PA The Netherlands

12    <sup>4</sup>School of Environmental and Geographical Sciences, Shanghai Normal University,  
13    Shanghai 200234, China

14    Correspondence: [jhwen@shnu.edu.cn](mailto:jhwen@shnu.edu.cn) (Jiahong Wen)

15

16    **Abstract:**

17    Delta cities are increasingly vulnerable to flood risks due to the uncertainties  
18    surrounding climate change and socioeconomic development. Decision-makers face  
19    significant challenges in determining whether to invest in ~~high-level flood defenses for~~  
20    ~~long-term planning~~. Adaptation solutions should be given considerable attention not  
21    only to **robustness but also to adaptiveness** if the future unfolds ~~not as expectation~~. To  
22    support decision-making and meet long-term multi-objective targets, we propose a  
23    synthesized framework that integrates robustness analysis, adaptiveness analysis, and  
24    pathway generation. This framework was applied to evaluate alternative solutions for

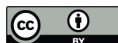

25 managing pluvial flood risk in central Shanghai. The results show that using a single-  
26 objective decision-making approach (focused only on robustness) tends to yield biased  
27 options. By examining the valid period and flexibility of candidate solutions, we  
28 assessed whether alternative solutions could meet long-term flood control targets. The  
29 analysis reveals that a combined option—incorporating increased green areas, an  
30 improved drainage system, and a deep tunnel with a 30% runoff absorption capacity  
31 (D+G+Tun30)—is the most robust and adaptive pathway, based on multi-objective  
32 trade-off analysis. This study highlights the importance of considering **valid period**  
33 **within predefined control targets** and retaining flexibility to avoid path-dependency and  
34 minimize long-term regrets. The proposed framework can be applied to other delta  
35 cities to guide adaptive responses to future flood risks.

36 **Keywords:** **decision-making under deep uncertainty**; flood risk reduction; multi-  
37 objective trade-off, robust adaptive pathway, Shanghai

## 38 **1 Introduction**

39 Flood risk is increasing in low-lying delta cities due to rapid urbanization and  
40 climate change (Yang et al., 2023), hindering the capacity of urban development. Delta  
41 cities such as Shanghai (Yin et al., 2020), Ho Chi Minh City (Scussolini et al., 2017),  
42 and London (Dottori et al., 2023) are facing the combined challenges from extreme  
43 rainstorms, sea level rise and urbanization-induced land subsidence with regard to  
44 flooding risk reduction (Ward et al., 2017). It is anticipated that as a result of changing  
45 climate patterns, the frequency and severity of extreme flood events will increase in  
46 urban area, thereby increasing the flood risk, particularly in increasing developing delta



47 cities (Sun et al., 2021).

48 Delta cities are urged to examine potential climate adaptation options (Han and  
49 Mozumder, 2021;) and test their cost-effectiveness in designed social and climate  
50 scenarios to address the rising flood risks (Lin et al. 2020). Dottori et al (2023)  
51 proposed ~~economically attractive~~ strategies for European cities to deal with increasing  
52 river flood risk ~~from cost-effective point of view~~. However, ~~if~~ these strategies or options  
53 will remain effective within a fixed timeframe under the uncertainties of climate change,  
54 land use change or political change is questionable; in addition, how ~~flexible~~ these  
55 strategies can be up-scaled to meet the future needs is ~~also~~ rarely discussed. This ~~comes~~  
56 ~~to~~ a pressing concern for decision makers in long-term planning. In the field of Decision  
57 Making under Deep Uncertainty (DMDU), various approaches have ~~been~~ emerged,  
58 such as Robust Decision Making (RDM) (Lempert et al., 2013; Workman et al., 2021),  
59 Dynamic Adaptive Policy Pathway (DAPP) (Haasnoot et al., 2013; Dias et al., 2020)  
60 and Real Options Analysis (ROA) (Buurman and Babovic, 2016; Kim et al., 2018; Xu  
61 et al., 2023).

62 These DMDU approaches have been continuously improved and optimized, the  
63 boundaries between methods have become increasingly blurred, and fusion thinking is  
64 progressively adopted (Haasnoot et al., 2020). As pointed out by Lempert et al. (2003),  
65 RDM provides systematic procedures that emphasize the iterative analysis process of  
66 scenario exploration, which can help decision-makers discover situations where options  
67 may fail, and understand the trade-off among all the adaptation options (Lempert et al.,  
68 2013). Kasprzyk et al. (2013) proposed the Multi-Objective Robust Decision Making



69 (MORDM) approach by the combination concept of both multi-objective evolutionary  
70 optimizations and RDM (Bartholomew and Kwakkel, 2020; Yang et al., 2021).  
71 Kwakkel et al. (2019) pointed out that the RDM approach usually pays less attention to  
72 the dynamic planning of pathways on long-term scales of climate change. On the other  
73 hand, DAPP, which consist of the strengths of both Adaptive Policymaking (Walker et  
74 al., 2001) and Adaptation pathway (Haasnoot et al., 2012; Ranger et al., 2010), focuses  
75 on generating alternative dynamic pathway to achieve flexibility and avoid lock-in  
76 effects while it lacks robustness metrics (i.e. satisficing and regret) and vulnerability  
77 analysis to quantify potential failures (Haasnoot et al., 2013).

78 Both the RDM and DAPP approaches are arguably in most widely applied, and  
79 the concept of integrating two approaches has been proposed (Kwakkel et al., 2016)  
80 and practiced in cases (Tariq et al., 2017). However, as Ramm et al. (2018a) illustrated,  
81 integration of RDM and DAPP has not been thoroughly implemented, and future  
82 opportunities to engage with participants in a combined RDM and DAPP approach  
83 include defining adaptation objectives, metrics and risk tolerance (Ramm et al., 2018b)  
84 since all these factors are anticipated to largely influence the outcomes of alternative  
85 pathways Robustness emphasizes the ability of a strategy to perform in an effective way  
86 in many plausible scenarios. How to define robustness and assess whether options are  
87 insensitive to deep uncertainty to ensure certain performance across multiple plausible  
88 futures have sparked extensive discussions, especially when meeting multi-objective  
89 targets (Herman et al., 2015; McPhail et al., 2018).

90 The selection of indicators for robustness depends on the priorities and preferences



91 by policymakers and it will substantially affect the outcomes of decisions (Giuliani and  
92 Castelletti, 2016). For example, the decision-makers who endorse risk aversion may  
93 under-estimate adaptation options' performance. To overcome the single objective  
94 problem framing, Quinn et al. (2017) optimized operations of the four largest reservoirs  
95 under several different multi-objective problem framings in Hanoi city (Vietnam), and  
96 highlighted the importance of formulating and evaluating alternative stakeholder  
97 objectives.

98 However, there is a need for a discussion on either the robustness evaluation of  
99 alternatives concerning policymakers' risk aversion can exclusively underpin rational  
100 decision-making or the multi-objective trade-off analysis can offer more  
101 comprehensive practical and theoretical support. For example, the cost of a climate  
102 adaptation option is normally proportional to its benefit (risk reduction rate). Options  
103 with high performance often mean higher cost input and potentially longer construction  
104 periods (Dottori et al., 2023). The single-objective in either performance assessment in  
105 reducing the risk or solely considering cost-benefit provided limited information for  
106 long-term planning, indicating a potential for lock-in or path dependency due to  
107 overinvestment or maladaptation over time.

108 Adaptiveness refers to the ability of a strategy to adapt to change (Haasnoot et al.,  
109 2013; Malekpour et al., 2020). In this sense, maintaining high level of robustness  
110 compromise high level of adaptiveness of a strategy as conditions change. For example,  
111 high cost of effective solution may cause path-dependency and fails to adapt to the  
112 changing circumstances due to its financial commitment and over-confidence on the



113 **safety from societies**. Considered as the other side of **coins against robustness**,  
114 **quantification of adaptiveness** is yet clearly addressed (Kind et al., 2018). Tipping point  
115 analysis provided insight into when the options might falter, indicating potential failure  
116 point concerning the risk reduction target (Haasnoot et al., 2013), and Patient Rule  
117 Induction Method (PRIM) is proven to be illuminated **to identify the use-by date of**  
118 **tipping points** in a quantitative way (Ramm et al., 2018a; 2018b). Kirshen et al. (2015)  
119 raised that the option of selecting urban flood control options may differ if additional  
120 criteria of no-regret and flexibility were considered, when a critical threshold is reached  
121 under a climate change scenario. Instead of applying optimal here-and-now options,  
122 wait-and-see decisions allow for flexibility. Within ROA, flexibility is valued since it  
123 allows delaying commitment to large, costly, and irreversible decisions while either  
124 exercising different interventions or incrementally implementing interventions with  
125 long construction times until more information is available (Erfani et al., 2018).  
126 Therefore, incorporating both the tipping point (specify as valid period later in this  
127 paper) and flexibility reflect the key characteristics of adaptiveness and thus **better**  
128 **assists in a long-term planning**

129 In this study, we aim to propose a synthesized framework which incorporates both  
130 robustness and adaptiveness to formulate a robust adaptive pathway for long-term  
131 climate adaptation planning under deep uncertainties. This framework can be utilized  
132 to guide decision-making on the prioritization and sequencing of climate adaptation  
133 alternatives, which nowadays remains as a pressing question for urban practitioners on  
134 climate action planning. To demonstrate the novel synthesized framework, it was

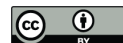

135 applied to examine various climate adaptation alternatives to address the increasing  
136 pluvial flood risk in a delta city – Shanghai, based on future (uncertain) scenarios of a  
137 combination of extreme rainstorm and the deteriorating drainage capacity by the time  
138 of 2050s, to support the decision-making.

139 The remainder of this article is organized as follows: Section 2 presents the  
140 proposed comprehensive framework and methodology. Section 3 introduces the  
141 background of the case study area and the preprocessing procedures. Section 4 presents  
142 the results, where a multi-objective trade-off is applied to evaluate the potential  
143 pathways for generating a robust adaptive pathway. This analysis combines metrics  
144 such as the average risk reduction rate (ARRR), benefit-cost ratio (BCR), valid period,  
145 and flexibility of all options. Section 5 discusses the key findings related to pluvial  
146 flood risk management in coastal cities, the implications of multi-objective trade-off  
147 considering both robustness and adaptiveness, how the synthesized framework can  
148 inform long-term adaptive policy formulation, and provides recommendations for  
149 future work. Finally, Section 6 concludes with a summary.

## 150 **2 Methodologies**

### 151 **2.1 Framework development**

152 Having established the challenges of pluvial flood risks posed by future deep  
153 uncertainties, this study now presents a robust adaptive pathway framework designed  
154 to support long-term planning. To build robust adaptive pathway framework, we  
155 extended the taxonomy proposed by Kwakkel et al. (2019), which categorizes existing  
156 DMDU approaches into five dimensions, akin to the taxonomy in the robustness



157 framework ([Herman et al., 2015](#)). Building on recent advancements in DMDU  
158 approaches, we further refined the framework into the following procedures:

159       1) **Research framing.** In contrast to the short-term implementation of baseline  
160 standards, the policy structure proposed in this work is designed to be dynamic and  
161 adaptive. It provides a continuous pathway toward achieving long-term flood control  
162 goals while maintaining the flexibility to adjust to an uncertain future. As a result, the  
163 'adaptive' options enhance the robustness of the solutions and reduce the risk of over-  
164 investment.

165       2) **Scenario generation.** The process of scenario generation applies multiple  
166 (uncertain) ~~factors of~~ meteorological, hydrological, or social-economic. The range of  
167 uncertain factors may ~~either~~ according to expert's opinion, policy guideline or climate  
168 projections ([Lempert et al., 2013](#)). Plausible futures can be generated via scenario  
169 sampling algorithms as of Latin Hyper Cube Sampling ([Workman et al., 2021](#)).

170       3) **Alternative generation.** Climate adaptation alternatives were developed  
171 through focus-group discussions during a workshop and an analysis of policy  
172 documents. The workshop included key stakeholders such as flood experts,  
173 policymakers, and residents. As a result, the existing flood options serve as the baseline  
174 scenario, compared to the generated climate adaptation alternatives which are set to be  
175 evaluated using flood modelling.

176       4) **Model simulation.** Flood inundation models such as SOBEK1D2D,  
177 Mike1D2D ([Wang et al., 2018](#)) and Info Works can be used to simulate flood routing





178 process and produce maximum inundation maps, which further can be used for flood  
179 risk assessment when incorporating the geospatial statistics.

180 **5) Robustness analysis.** To evaluate the robustness of all options that have the  
181 highest utility under a certain threshold, robustness metrics (e.g. Laplace's principle of  
182 insufficient reason) were used as the decision-making criterion. The calculation of  
183 indicators such as the average risk reduction rate (ARRR) and benefit-cost ratio (BCR)  
184 for each alternative option was performed for each scenario, with an assumption of  
185 equal probability for their occurrence. Subsequently, the performance of each option  
186 and its combination was evaluated by quantitative comparison and ranking stability  
187 (McPhail et al., 2018).

188 **6) Adaptiveness analysis.** Valid periods of the alternative options were  
189 determined based on the conditions of the successful scenarios under each (individual  
190 or combined) option, in conjunction with a specific flood control objective. Optimizing  
191 the value of coverage and density of subspace in the PRIM (Patient Rule Induction  
192 Method) algorithm help to identify signposts in the adaptation pathway which is in line  
193 with the idea of the tipping point in DAPP. Flexibility is evaluated by the ability of  
194 convertibility.

195 **7) Multi-objective trade-off.** Multi-objective trade-off was implemented using  
196 robustness and adaptiveness metrics to evaluate the candidate alternatives. All the  
197 metrics are given equal weight and are compared based on their normalized values. The  
198 alternative options with highest score to satisfy all the objectives are regarded most  
199 promising.



200           **8) Robust adaptive pathway.** In light of the adaptability of the valid period  
201 (tipping point) and flexibility of transitions in each alternative portfolio, potential  
202 pathways were identified, and generated a roadmap based on transient scenarios. A  
203 robust adaptive pathway was selected in multi-objective to satisfy the flood control  
204 criteria for long-term planning. The signposts can be monitored to support future  
205 decisions.

## 206   **2.2 Methods of robust adaptive pathway procedures**

### 207       **Robustness analysis**

208       The choice of robustness option is the meta-problem of **how to decide** (Herman et  
209 **al., 2015**). The performance of a system is frequently described by robustness option  
210 when dealing with a decision-making process, including significant uncertainty.  
211 Various robustness metrics, including Maximax, Maximin, Mean-variance, Starr's  
212 domain criterion, Laplace's principle of insufficient reason, etc., are used to evaluate a  
213 system's performance in **various scenarios (state of the worlds)**. **Different robustness**  
214 **metrics represent distinctive risk preferences, and the selection of robustness indicators**  
215 **influences the choice of alternative options** (Giuliani and Castelletti, 2016). For the risk  
216 aversion metric, the Laplace principle of insufficient reason is widely documented to  
217 help identify the solution that performs best in neutral risk aversion. Furthermore, it  
218 suggests that in the absence of knowledge of the probabilities associated with the  
219 different scenarios, the decision could be taken by assigning equal probability to all  
220 scenarios. The performance of option  $i$  is depicted as Equation (1).



$$221 \quad a_p = \arg \max_a \left( \frac{1}{n} \sum_{i=1}^m \sum_{j=1}^n f(a_i, w_j) \right) \quad (1)$$

222 Where  $a_i$  is option  $i$  of alternative options set ( $a$ ) (listed in table 2), and  $w_j$  is in  
223 the scenario set  $w$ .  $f(a_i, w_j)$  represents the option performance value of scenario  $j$ ,  $a_p$   
224 is the selection of option  $p$  with best performance.

225 Satisfaction and regret are frequent indications of robustness options in RDM  
226 decision-making procedures (Herman et al., 2015). Broadly, regret quantifies the cost  
227 (not necessarily monetary) of choosing incorrectly. It can be defined as the cost of a  
228 single solution, associated with the deviation from its baseline performance. On the  
229 other hand, satisfaction can be defined as the amalgamation of effectiveness and  
230 efficiency. In this situation, the evaluation of candidate options' performance is  
231 presented as the deviation from the baseline performance. see Equation (2).

$$232 \quad P_i = \frac{1}{n} \sum_{i=1}^m \sum_j \frac{|f(a_i, w_j) - f(a_0, w_j)|}{f(a_0, w_j)} \quad (2)$$

233 Where  $P_i$  is the average performance of alternative options,  $f(a_i, w_j)$  represents  
234 the performance value of scenario  $j$ , and  $f(a_0, w_j)$  is the performance of the **baseline**  
235 **option** of scenario  $w_j$ .

236 Decision-makers care that whether **the scenario sets of alternative options** contain  
237 an unacceptable possibility. **The threshold for vulnerable scenarios defines whether**  
238 **there is an intolerable risk control level.** The domain criterion quantifies the volume of  
239 the uncertain factor space in which a solution meets the decision-makers' performance  
240 requirements. Indicators of risk control policy are frequently included in the research,  
241 such as local environmental protection legislation, urban drainage planning, and other  
242 documents. They can also provide appropriate reference opinions determined by local

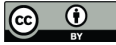

243 governments or relevant decision makers and experts. Based on the elicitation of local  
244 requirements, we define the  $P_i^*$  as the average performance of risk reduction which  
245 satisfies the minimum threshold of the given flood control target ( $F_0, F_0=0.7$  in this  
246 case), as depicted in Equation (3).

$$247 \quad P_i^* = \frac{1}{n} \sum_{i=1}^m \sum_{j=1}^n f(a_i, w_j) \geq F_0 \quad (3)$$

248 Where  $P_i^*$  represents the average performance value of the option  $a_i$  in all  
249 plausible scenario that meets the given flood control target  $F_0$ .

250 Internationally, the net present value of benefits (PVB) and the net present value of  
251 costs (PVC) are commonly used to represent benefits and costs, respectively (Liao et  
252 al., 2014). In this study, PVB is selected as the pluvial flood risk reduction rate (RRR)  
253 before and after the implementation of the options, rather than as the pluvial flood risk  
254 reduction value. It is important to note that the goal of this study is not to calculate the  
255 direct risk of extreme pluvial flooding in the future, as the absolute value of the risk  
256 would be too large for meaningful comparison. Therefore, the benefit-cost ratio (BCR)  
257 is presented simply as the ratio of PVB to PVC.

### 258 **Adaptiveness analysis**

259 PRIM is an interactive statistical clustering algorithm that generates a series of  
260 subspaces by peeling away layers of the uncertainty space, where the coverage and  
261 density of points of interest in each box are greater than in the surrounding space  
262 (Matrosov, 2013). As a visualized tool for exploratory analysis, PRIM is widely used in  
263 many works to investigate either key factors causing system failure or vulnerable



264 scenarios that might cause alternative options' failure. Parameters of coverage, density,  
265 and interpretability characterize the subspaces. These three metrics are usually  
266 correlated, with increasing density resulting in decreasing coverage and interpretability.  
267 It turns out that an analyst needs to ~~trade-off in~~ selecting the potential coverage, density,  
268 and interpretability to achieve the best combination. The subspaces describe the  
269 conditions beyond which coastal inundation impacts are unacceptable signifying  
270 adaptation tipping points are reached (Ramm et al., 2018a). Key factors along with the  
271 tipping point of options are evaluated in associated timeframes which need not be exact.  
272 Identifying an indicative period at which conditions describing adaptation tipping  
273 points indicate a valid period (or use-by year) (Haasnoot et al., 2013). The results of  
274 PRIM can assist decision-makers in identifying sensitive ranges of uncertain factors or  
275 combinations, and factors with little influence can be safely disregarded.

276 Following ~~a decision initially~~, flexibility in decision theory is related to the  
277 remaining choices available in the following period. The larger this set, the more  
278 flexibility the decision maker retains. This idea can be generalized to staged choices  
279 over multiple periods. For example, Erfani et al. (2018) proved that flexibility is  
280 valuable in providing decision nodes in multistage scenarios (planning periods in every  
281 5 years) for least-cost water supply intervention scheduling. One way of deriving the  
282 value of flexibility is thus by comparing costs and benefits of a flexible investment  
283 strategy with those of a **less flexible, that is, a more robust strategy** (Kind et al., 2018).  
284 However, flexibility is not treated as delayed option value as other ROA work  
285 calculated, instead, we consider the convertibility of options that is still in line with the



286 idea of wait-and-see yet is more straight-forward.

### 287 **Multi-objective trade-off**

288 The cost and benefit of investment in adaption options may lead to a static  
289 decision-making perspective. Therefore, an important question was raised for robust  
290 decision-making of how to avoid failure scenarios regarding factors including risk  
291 reduction rates over time, cost of option, and economic benefit ratio. On this basis,  
292 making robust decisions needs to include other factors beyond cost and benefit, such as  
293 **valid period** and flexibility, for a comprehensive evaluation in the long-term (Erfani et  
294 al. 2018)

295 The optimization of options' combinations can be identified via the trade-off  
296 process by Equation (4).

$$297 \text{ Maximize } F(l_{p,r}) = (y_{flexibility}, y_{valid\ period}, y_{cost-benefit}, y_{performance}) \quad (4)$$

298 Where  $l_{p,r} = [p_i, r_i] \forall p \in P; \forall r \in R$

299 Where  $l_{p,r}$  represents the pathway scheme,  $r_i$  is any of the robustness metric set R.  
300  $y_{flexibility}$ ,  $y_{valid\ period}$ ,  $y_{cost-benefit}$  and  $y_{performance}$  are the values of indicators  
301 from different dimensional objects.

### 302 **Robust adaptive pathway**

303 Adaption tipping points (**valid periods**) are central to adaptation pathways, the  
304 **conditions under which an action no longer meets the specified objectives**. The timing  
305 of the adaptation points for a given action, its valid period, is scenario dependent. The  
306 DAPP, manually drawn based on model results or expert judgment, presents an  
307 overview of relevant pathways (Haasnoot et al., 2020). In this study, we first examined



308 the valid period of alternative options by PRIM analysis to identify acceptably robust  
309 adaptation pathway for future flood control. We then identified the combination of  
310 candidate pathways in consideration of both valid period and flexibility, ensuring the  
311 adaptive solutions in incremental stages allow for maintaining flood control levels  
312 before committing to larger schemes. Roadmap of candidate's pathways are generated  
313 during this procedure. Lastly, the preferred robust pathway is determined by a trade-off  
314 analysis of all the criteria.

### 315 **3 Case study**

#### 316 **3.1 Background**

317 Shanghai, with a domain of 6,340 km<sup>2</sup>, provides residences to 24.9 million  
318 population with a built-up area of 1237.9km<sup>2</sup> in 2021. Shanghai has been perhaps the  
319 most important economic and financial center in China, and it now aspires to be one of  
320 the world's most important economic, financial, shipping, and trade centers ([Shanghai](#)  
321 [Statistic Yearbook, 2021](#)). Shanghai is surrounded by water on three sides: the East  
322 China Sea to the east, the Yangtze River Estuary to the north, and Hangzhou Bay to the  
323 south. In addition, the Huangpu River, a Yangtze River tributary, flows through the heart  
324 of Shanghai. The average yearly precipitation is approximately 1400mm in recent 10  
325 years, with 63% concentrated during the flooding season from May to September  
326 ([Shanghai Climate Change Research Center, 2022](#)). As a result, the most catastrophic  
327 hazard in Shanghai has been floods produced by torrential rainfall, which annually  
328 disrupts transportation and other social activities, causes substantial economic losses,  
329 and threatens urban safety.



330 Shanghai has the lowest elevation (with averagely 4m above m.s.l.) and large  
331 numbers of old-lane residential buildings in central city, which have fewer floors  
332 compared to other districts that is vulnerable to the extreme pluvial flood events see  
333 [Figure 1](#)). The spatial distribution of rainfall will continue to concentrate in urban areas,  
334 and the increasing likelihood of extreme precipitation ([Liang and Ding, 2017](#)),  
335 combined with the trends of relative sea-level, will cause stakeholders, includes  
336 residents, policymakers, and scientists etc., to be concerned about the rising flooding  
337 risk in delta cities of Shanghai ([Du et al., 2020](#)).

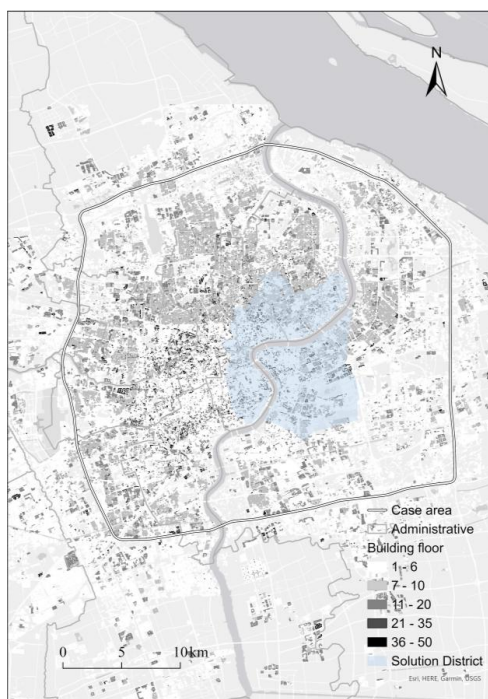

338  
339 Figure 1 Case area, administrative, and solution district (blue shade) in center Shanghai,  
340 including spatial distribution of building footprints indicating the number of stories (gray shades),  
341 the base map was provided by Esri, using ArcGIS Online Services.





### 342 3.2 Research Framing

343 Based on the proposed framework, the dimensions, components, and metrics of  
 344 this study are organized as shown in Table 1. To ensure urban safety, this study defines  
 345 an explicit flood control objective of achieving a 70% average risk reduction rate, in  
 346 alignment with the Shanghai Flood Control and Drainage Plan (2020–2035) (Shanghai  
 347 Municipal Water Authority, 2020).

348 Table 1 Dimensions of the research framework

| Dimension                                         | Components                                                                        |                                |                                                        | Metrics                                |
|---------------------------------------------------|-----------------------------------------------------------------------------------|--------------------------------|--------------------------------------------------------|----------------------------------------|
| Research framing                                  | Alternative options to generate robust and adaptive pathway                       |                                |                                                        | Definition of flood control objective  |
| Scenarios generation                              | Increased rainfall                                                                | Rain island effect             | Drainage decrease                                      | Latin hypercube sampling (LHS)         |
| Alternatives generation                           | Drainage increased                                                                | Increase of green area         | Deep tunnel with 30%, 50%, or 70% of runoff absorption | Predefined by local flood control plan |
| Model simulation                                  | Hydrology                                                                         | Flood risk                     | Geospatial statistics                                  | Grid aggregation                       |
| Robustness analysis                               | Performance (ARRR)                                                                | Measure Cost (Life cycle cost) | Benefit                                                | Laplace and Domain criterion           |
| Adaptiveness analysis                             | Signpost                                                                          | Valid period                   | Flexibility                                            | PRIM                                   |
| Multi-objective Trade-off Robust adaptive pathway | Robustness                                                                        |                                | Adaptiveness                                           | Metric evaluation                      |
|                                                   | Candidate pathway identification, roadmap generation, and monitoring of signposts |                                |                                                        | Transition scenarios                   |

349 The robustness analysis serves as the foundation of our methodology, ensuring  
 350 that the proposed solutions can withstand future uncertainties. Once robustness is  
 351 assessed, we proceed to the adaptiveness analysis, which allows us to account for  
 352 flexibility in response to unforeseen challenges. The trade-off optimization in terms of  
 353 robustness and adaptiveness was of particular significance to providing iterative stress  
 354 tests over many plausible scenarios using robustness metrics and identifying valid



355 periods and flexibility to generate alternative pathways. Following the structure of  
 356 robust decision-making pathway framework, Figure 2 illustrates the entire procedures  
 357 for long-term flood control planning in the Shanghai case study.

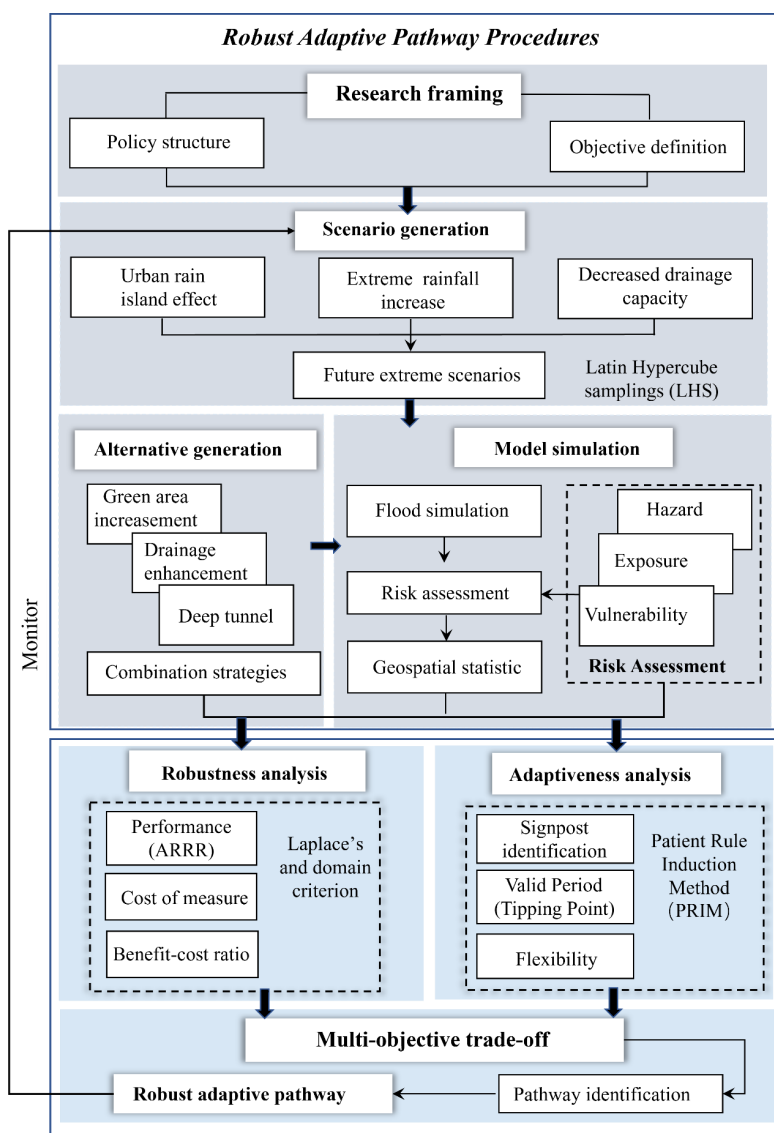

358  
 359 Figure 2 Framework of robust adaptive decision-making pathway, which incorporates the  
 360 robustness, adaptiveness, multi-objective trade-off, and pathway generation (blue boxes).



### 361 3.3 Scenario generation

362       Precipitation is predicted very likely to increase in the Yangtze River Basin in the  
363 21st century (Hui et al., 2018), and the frequency and intensity of extreme rainstorm  
364 events may continue to increase (uncertain factor of the  $\alpha$ ). Shanghai's spatial rainfall  
365 patterns reveal a significant "rain island effect" between urban centers and suburbs  
366 (Liang and Ding, 2017) (uncertain factor of the  $\beta$ ). In addition, land subsidence has  
367 been a persistent issue due to the groundwater exploitation and construction of high-  
368 rise buildings (Yang et al., 2020). By 2050, it is projected that the current river  
369 embankment and drainage systems in Shanghai will experience a 20-30% reduction in  
370 capacity due to a likely relative rise in sea level of 50 cm (compared to the year of 2010),  
371 caused by both sea level rise and land subsidence (Wang et al., 2018). The uncertain  
372 factor of the decrease of drainage capacity( $\gamma$ ) is designed to be the degradation effect  
373 of restraining the water from the urban drainage system flowing to the river system due  
374 to the high river water level caused by the continually rising sea level, land subsidence,  
375 and other degradation factors.

376       This study focused on a record-breaking convective rainfall that occurred on  
377 September 13, 2013 and had an intensity record of 140.7mm within 3 hour (at 17-19h).  
378 The variation interval of each uncertainty factors was clarified, and Latin Hyper Cube  
379 Sampling (LHS) was used to construct 100 future scenario cases based on the historic  
380 "913" extreme rainfall event in 2013 (Supplementary materials Text 1).

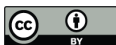

### 381 **3.4 Alternative generation**

382 It is acknowledged that the current Shanghai flood control infrastructure is  
383 insufficient to protect the city from long-term inundation risk (Shanghai Municipal  
384 Water Authority, 2020). Three options, drainage improvement, increase of green area,  
385 and construction of deep tunnel, are pre-defined with stakeholders of experts and  
386 decision-makers following the Shanghai Flood Control and Drainage Plan (2020-2035).  
387 The solution district locates in the core business district (CBD) of Shanghai and is  
388 highlighted in [Figure 1](#). We defined the existing structure of flood control measures as  
389 the baseline and evaluated alternative measures' performance verse the baseline control  
390 level in the flood simulation model ([Table S4](#)).

### 391 **3.5 Model simulation**

392 Simulations of extreme pluvial flood inundation under climate change scenarios  
393 are carried out using the Shanghai Urban Inundation Model (SUIM) ([Supplementary](#)  
394 [materials Text 2](#)). It was created to couple multiple simulation processes, which consists  
395 of the SCS-CN hydrological model, statistical analysis of flooding results, risk  
396 assessment, and assessment of adaptation measures. Appropriate socioeconomic  
397 indicators were selected to characterize the exposure of the elements at risk and the  
398 vulnerability curve to evaluate the flood risk in all plausible scenarios ([Supplementary](#)  
399 [materials Text 3](#)). We then coupled the hydrological module and risk assessment module  
400 to assess the future risk ([Supplementary materials Text 3](#)). Three climate adaptation  
401 options are quantitatively characterized in the risk assessment system. The benefit-cost  
402 ratio (BCR) of all options is calculated according to the performances of the risk



403 reduction rate over the life cycle cost ([Supplementary materials Text 4](#)).

## 404 **4 Results**

### 405 **4.1 Robustness analysis**

406 This section presents the performance evaluation results, including average risk  
407 reduction rate (ARRR) and Benefit-cost ratio (BCA), to reflect **the robustness** of  
408 potential climate adaptation options ([Supplementary materials Text 3](#)). Benefit-cost is  
409 the evaluation dimension for the robustness metrics, we evaluated their robustness  
410 under various plausible scenarios ([Equation 1 in Section of ‘Methods’](#)). It should be  
411 noted that benefit-cost, was defined as the average risk reduction rate (ARRR) per unit  
412 cost based on the robustness metrics of Laplace’s Insufficient Reason. Given that  
413 drainage capacity reduction ( $\gamma$ ) is the main factor affecting the solutions’ performance,  
414 thus the study selects  $\gamma$  as the only explanatory indicator to explore the failure scenario  
415 of options based on the PRIM method.

416 As depicted in [Table 2](#), the ARRR is calculated ([Equation 2](#)) to analyze the  
417 effectiveness of (the combination of) options. The average yearly cost of single options,  
418 which includes increasing drainage capacity (Dr), expanding green areas (GA), and  
419 constructing a deep tunnel with 30% runoff absorption (Tun30), is at a comparative  
420 level, ranging from 39 to 41 million USD per year. Their performance is relatively  
421 unsatisfactory (the ARRR is less than 0.39.) However, the ARRR for the combined  
422 option (D+G), drainage improvement and public green area, is higher (0.62) than the  
423 sum of two single options (0.51), indicating that the composite option will be more



424 effective of reducing flood risk. Furthermore, it demonstrates that the combined options  
 425 (i.e., D+G and D+G+T30) are satisfactory in terms of ARRR performance but not  
 426 economically attractive due to their relatively higher costs.

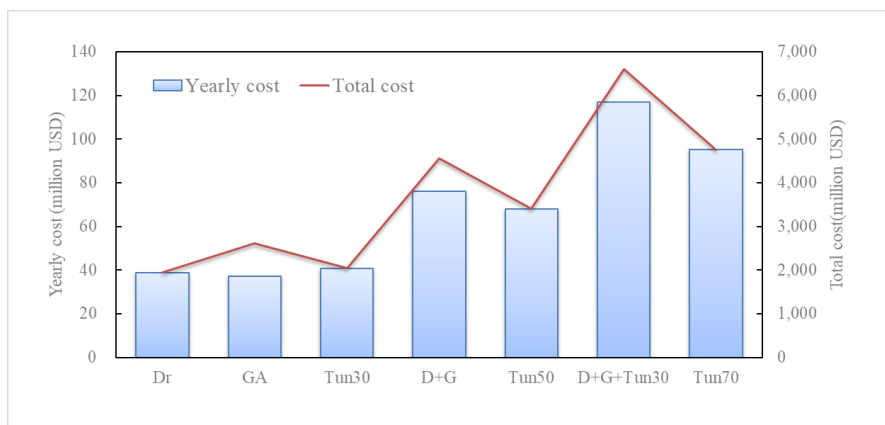

427

Figure 3 Yearly cost and total cost of alternative options

428

429 While two single options of deep tunnel (namely Tun50, Tun70) seem very  
 430 attractive (achieving high ranks in both ARRR and BCR).

431

Table 2 The ratio of the benefit-cost of each adaptation options

| Option    | ARRR (without control target, %) | Cost (million USD / year) | Benefit-cost ratio (%) |
|-----------|----------------------------------|---------------------------|------------------------|
| Dr        | 0.25                             | 39                        | 0.09                   |
| GA        | 0.26                             | 37                        | 0.10                   |
| Tun30     | 0.39                             | 41                        | 0.14                   |
| D+G       | 0.62                             | 76                        | 0.12                   |
| Tun50     | 0.74                             | 68                        | 0.16                   |
| D+G+Tun30 | 0.85                             | 117                       | 0.10                   |
| Tun70     | 0.87                             | 95                        | 0.13                   |



#### 432 4.2 Adaptiveness analysis

433 Scenario discovery validates the decrease of drainage capacity is the most critical  
434 uncertainty in defining the risk reduction rate of performance objective. The failure  
435 scenarios could be identified when the flood control target is not met. We further  
436 interpret failure scenarios by selecting subspace of each alternative options under flood  
437 control target using PRIM algorithm to optimize the combined value of coverage and  
438 density. The **valid period** is determined as the point when the single options or the  
439 combinations cease to fulfill the flood control target, indicated by the time which is  
440 characterized by  $\gamma$  (the reduction in drainage capacity).

441 According to the results in [Table 3](#), it was found that within the 70% risk reduction  
442 control target ([Equation 3](#)), the single options of Dr and GA performed less favorably  
443 (relatively smaller ARRR) and can quickly fail to meet the risk reduction target (with  
444 no larger than 0.1 of  $\gamma$ ). Tun30 and D+R are very comparative since they preform very  
445 closely (similar results on ARRR and  $\gamma$ ) but still not attractive. While Tun50 seems very  
446 attractive in terms of ARRR (0.89) however, it does not possess higher valid period ( $\gamma$ )  
447 than both D+G+Tun30 and Tun 70. Surprisingly, both D+G+Tun30 and Tun70 can  
448 function well in an effective way for a longer time. So far, D+G+Tun30 and Tun70 have  
449 proven to be highly competitive in terms of cost-effectiveness and valid period over  
450 time.

451 Table 3 ARRR and coverage and density of success scenarios in each option combinations  
452 under 70% risk reduction control standard

| Option | ARRR (with | Coverage | Density | Decreased drainage |
|--------|------------|----------|---------|--------------------|
|--------|------------|----------|---------|--------------------|



|           | control target, % |      | capacity ( $\gamma$ ) (valid period) |      |
|-----------|-------------------|------|--------------------------------------|------|
| GA        | 0.59              | 1    | 0.22                                 | 0.04 |
| Dr        | 0.62              | 1    | 0.20                                 | 0.07 |
| Tun30     | 0.73              | 1    | 0.75                                 | 0.1  |
| D+G       | 0.74              | 0.9  | 0.82                                 | 0.11 |
| Tun50     | 0.89              | 0.95 | 0.98                                 | 0.29 |
| D+G+Tun30 | 0.86              | 0.99 | 0.98                                 | 0.48 |
| Tun70     | 0.87              | 1    | 1                                    | 0.5  |

453 we define flexibility as the number of transitions by enumerating overall option  
454 combinations regarding adaptive transferable pathways from the original option  
455 (current flood control infrastructure) to the destination options (e.g., D+G+Tun30 and  
456 Tun70, Figure 5). For example, the D+G+Tun30 comprises three single options,  
457 allowing it to begin with any of the three and delay further action until a tipping point  
458 approaches, giving it a convertibility score of three (Table S6). Therefore, each single  
459 option has a value of one for convertibility.

#### 460 **4.3 Multi-objective trade-off**

461 Robustness analysis suggests Tun50 and Tun70 might be attractive while  
462 adaptiveness analysis indicates D+G+30 as the most appealing. Therefore, the single-  
463 objective metrics yield different decision choices, it is crucial to evaluate all the metrics  
464 to conduct a multi-objective trade-off among the alternative options to assist the robust  
465 and adaptive decision making. Multi-objectives of (the combination of) options  
466 consider all four metrics, including BCR, and performance of the risk reduction control  
467 criteria (ARRR>70%), valid period ( $\gamma$ ), and the flexibility. We solved the multi-  
468 objective problem using normalized and equally weighted metrics (Equation 4). Figure





469 4 depicts the results of BCR, ARRR in control criteria, valid period, and flexibility of  
470 each option's combination. The higher the normalized rating, the greater the payoff. The  
471 outcome demonstrates that both GA and Dr perform poorly, whereas Tun30 and D+G  
472 are not robust enough compared to Tun 50, D+G+Tun30, and Tun70. It needs to be  
473 highlighted that Tun 50, D+G+Tun30, and Tun70 possess high priority; however,  
474 D+G+Tun30 outperforms due to its well-balanced overall risk control performance and  
475 high value of flexibility (Table S7).

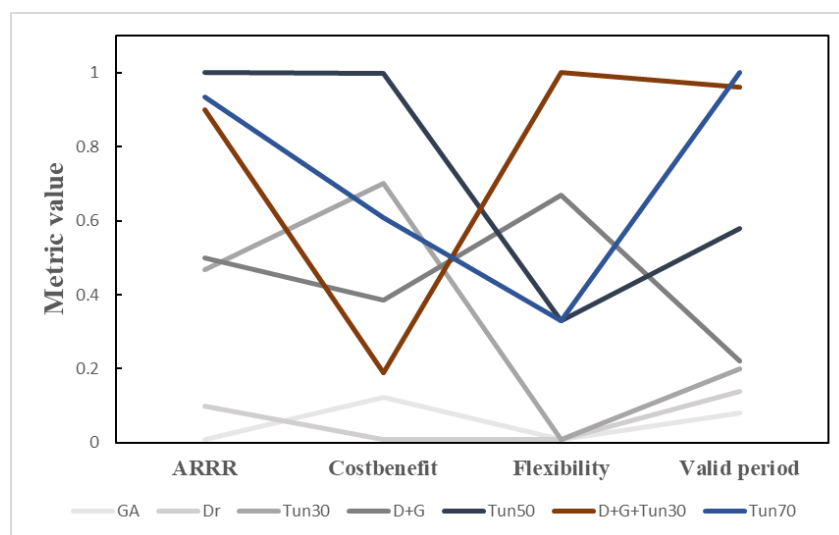

476  
477 **Figure 4** Multi-objective trade-off of alternative options with normalized value of robustness  
478 metrics (the preference of priority is accepted from low(bottom) to high(top)).

#### 479 4.4 Robust adaptive pathway

##### 480 Pathway identification

481 The candidate pathway was identified by enumerating the possible combinations  
482 of options. In this study, we found two potential pathways including from Tun30 to



483 Tun70, and from Dr or GA to D+G+Tun30. It can be observed from [Figure 5](#) that when  
484  $\gamma$  increases, the performance of options of Dr (or GA, vice versa) steadily diminishes  
485 until the risk control target are not satisfied.

486 The drainage capacity, affected by the compound event of land subsidence, sea  
487 level rise, and storm surge, is deemed to be undermined (which is reflected by drainage  
488 capacity reduction rate  $\gamma$ ) **over time**. [Figure 5](#) illustrates the concept of an option  
489 combination's valid period using Dr+GA+Tun30 as an example. ARRR to begin with  
490 Dr is 0.62, with an increase in  $\gamma$ , Dr fails ( $\gamma=0.07$ ), and ARRR will decrease further if  
491 no additional options are taken. The addition of GA can increase the ARRR to 0.74  
492 before Dr and D+G fail ( $\gamma=0.11$ ). The ARRR will continue to decrease if options are  
493 not strengthened. Before D+G completely fails, incorporating Tun30 can increase the  
494 ARRR to 0.86; as  $\gamma$  increases, D+G+Tun30 fails at  $\gamma=0.48$ . To ensure the adaptive  
495 robustness of the combination of options, decision-makers can increase the service  
496 coverage area and rainwater absorption capacity of the deep tunnel project in the core  
497 area prior to the total failure of D+G+ Tun30. In other words, the transition from Tun30  
498 to Tun50 and even Tun70, along with the combination of options, will be stable over  
499 the long-term time horizon.

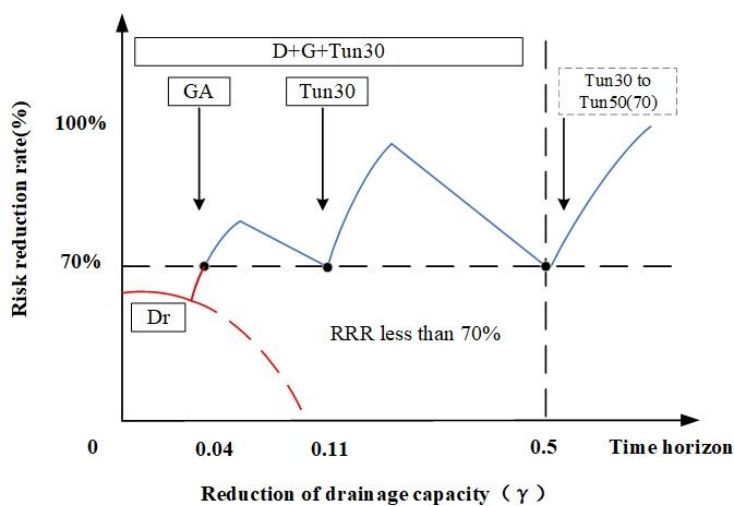

500

501 [Figure 5](#) Flexible pathway of combination options of drainage improvement (Dr), green  
502 area increment (GA), and deep tunnel with 30% absorption (Tun30), representing the risk  
503 reduction rate undermines with the reduction of drainage capacity. An example of  
504  $Dr+GA+Tun30$

### 505 Pathway generation

506 We comprehensively evaluated the candidate pathways by considering  
507 performances, BCR, valid period, and flexibility. The time frame lacks an absolute time  
508 reference but still offers a relative tracking of the rate at which relative sea levels are  
509 rising.

510 [Figure 6](#) depicts two robust transition pathways: D+G to D+G+Tun30 and Tun30  
511 to either Tun50 or Tun70. The two pathways D+G+Tun30 and Tun30 to Tun70, provide  
512 adaptive short and long-term pathway schemes from a flexibility standpoint. The short-  
513 term options are used as transitional schemes, and new options can be added before  
514 their failure, i.e., pathway transition, to maintain the risk control objectives. In addition,



515 the two schemes can complement each other and incorporate new options before the  
516 system's long-term robustness is compromised. Additionally, D+G+Tun30 and Tun70  
517 leave room for upgrading to the costlier and more durable D+G+Tun70 in the long run  
518 when  $\gamma$  exceeds 0.5 (e.g., sea level or land subsidence exceeds observing increase  
519 speed).

520 Tun70 possesses the highest robustness and the longest valid period; however, the  
521 early investment in large gray infrastructure will lead to a path-dependency dilemma if  
522 the mild scenarios unfold in the future. Considering that Dr and GA have been gradually  
523 implemented according to Shanghai Urban Rainwater Drainage Planning (2020-2035)  
524 (Shanghai Municipal Water Authority, 2020) and that combining green and grey options  
525 is in line with the direction of sustainable urban development and has been widely  
526 adopted domestically. In conclusion, A promising robust adaptive pathway should  
527 initially begin with GA and Dr, followed by a combination of D+G. Ultimately as time  
528 goes by with gradually undermined drainage capacity, it should incorporate Tun30 with  
529 the flexibility to expand to Tun70.

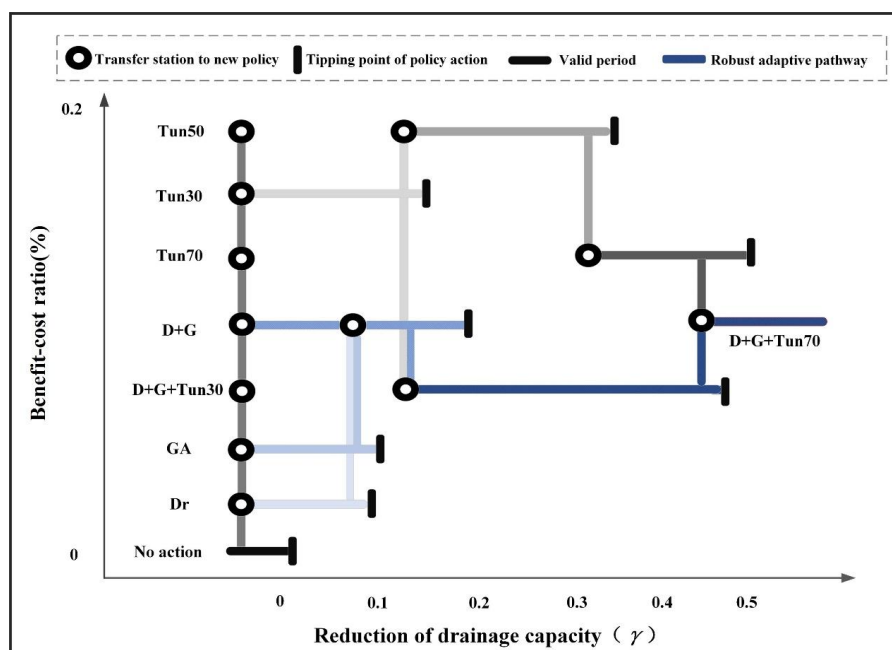

530

531 Figure 6 Generation of robust adaptive pathways with two potential pathways from either Dr or GA  
 532 to D+G+Tun30, and from Tun30 to Tun70 as the reduction of drainage capacity over time (x-axis).  
 533 The options are sequenced in an upward relative higher BCR (y-axis, also see in Table 2).

## 534 5 Discussion

### 535 5.1 Key findings

536 Applying this framework to the case of the reoccurrence in the 2050s (of the  
 537 extreme rainfall events on 13 September 2013) in Shanghai reveals informative findings  
 538 to urban planners and other stakeholders. First, the performance of climate adaptation  
 539 options (for addressing pluvial flood risk) decreases as the drainage capacity reduction  
 540 rate ( $\gamma$ ) increases (Table 3). This result is indirectly supported by events in June 2015  
 541 and July 2021, which caused severe inundation in central Shanghai for days because



542 the high water levels of rivers in the region prevented rainwater from being pumped or  
543 drained from the drainage system into the river network. This finding also suggests that  
544 drainage capacity is a key determining factor for the performance of options in other  
545 delta cities which may rely on discharge to the rivers (e.g., Guangzhou, [Ho Chiming](#)  
546 City, London, etc.) ([Hu et al., 2019](#)). Urban planners in those cities need to consider  
547 scenarios of high-water levels in the river with a joint of extreme storm surge under  
548 typhoon takes place in a high astronomical tide period at estuary. Such an event would  
549 significantly undermine the drainage capacity thus leading to severe flooding inside the  
550 city and bringing potential disastrous impacts (e.g. [Zhou et al., 2019](#)).

551 Second, as the drainage capacity decreases( $\gamma$ ), valid periods of different option  
552 combinations varied significantly, showing a discrete distribution, which ranged from  
553 [0.04~0.5](#) with a corresponding ARRR ranging from 0.59~0.89 ([Table 3](#)). Moreover,  
554 the most cost-effective solution may not always offer the longest valid period within an  
555 explicit flood control target (e.g. 70% risk reduction as a target in our case study), and  
556 therefore cannot be considered satisfactory ([Figure 4](#)). The findings highlight the  
557 importance of the discussion regarding the long-term robustness of solutions which has  
558 been overseen in many flood- risk control works in delta megacities. It is also further  
559 implying that if there is no consideration of the flood risk reduction target, discussions  
560 about a robust decision plan with stakeholders is meaningless. This urges to pay great  
561 attention to be proactive by strengthening the dynamic pathway and closely monitoring  
562 the decrease of the drainage capacity ahead of the pace of relative sea level rising  
563 ([Figure 5](#)).



## 564 **5.2 Robustness and adaptiveness trade-off**

565 The comparison in [Section 5.1](#) brings up a vital decision-making issue on the trade-  
566 offs between the benefit and cost of alternative options. In general, options with better  
567 performance required higher costs, which was also proved in any distinctive option in  
568 [Table 2 and Table S6](#). It is also demonstrated that the combination of alternative options  
569 such as D+G showed a better performance than the single option of Dr and GA at the  
570 same cost. However, the cost of an option is not strictly proportional to its benefit (risk  
571 reduction rate) ([Figure 3](#)). For instance, Tun 50 possesses better performance in  
572 reducing inundation risks associated with the relatively low yearly economic cost  
573 compared to D+G. Because it is difficult to measure the pros and cons of the costly  
574 solution to maintain a higher protection standard and economical solution to possess an  
575 acceptable performance (cost-effectiveness), planners typically underestimate both  
576 influences by a large margin.

577 In recognition of this limitation, it can be realized that single-objective targets e.g.,  
578 flood control performance (ARRR), or financial control (BCR) may lead to biased  
579 decisions or maladaptation for the long-term horizon. For example, [Table 2](#) shows that  
580 Tun50 has the highest cost-effectiveness (0.16), while the D+G+Tun30 is positioned at  
581 an average level, both of which performed well in reducing flood risk. In sharp contrast,  
582 the adaptiveness analysis shows that the D+G+Tun30 behaved significantly better  
583 during a reasonable period than Tun 50, which is a more flexible and adaptive option  
584 for long-term planning ([Figure 6](#)). Therefore, it tends to a biased decision if the decision  
585 maker only focus on economic return (BCR). Besides, it illuminates the decision maker



586 that priorities on **grey** infrastructure (e.g., Tun 50) at the starting point yields good  
587 performance (74% of ARRR) but may lead to over-investment and **path dependency**.  
588 Moreover, there is concern that the valid period could be shorten if decision-makers opt  
589 for the most cost-effective solution (Tun50) instead of choosing a more expensive but  
590 very effective combination (D+G+Tun30). This example enriches the literature on “no  
591 regret” planning, which should be robust, adaptive, and financially efficient at the  
592 starting point for decision-makers, keep options open (flexible), and avoid lock-ins. To  
593 minimize regret in the near to long future, the adaptation solutions should pay great  
594 attention to both robustness and adaptiveness, which also illuminates the importance of  
595 multi-objective trade-off as mentioned in previous work (Kirshen et al., 2015; Ramm  
596 et al., 2018a).

### 597 **5.3 Optimization of the synthesis framework**

598 Although there is a myriad of research running flood risk simulations and assessing  
599 the BCR of solutions in Shanghai and other megacities in the coastal areas, seldom of  
600 which considers the entire process in making the applicable decision (Du et al., 2020;  
601 Sun et al., 2021; Ward et al., 2017). In filling up this niche, this study has proposed a  
602 synthesized planning-supporting framework that is capable of considering the entire  
603 cascade of procedures from the uncertainties of future urban rainfall pattern, to the  
604 sampling of future scenarios, to the hydrological modeling, and to flood risk assessment  
605 for the robustness and adaptiveness of alternative options, allowing for making robust  
606 and adaptive pathways (refer to Figure 1).

607 Compared to other DMDU theories, the synthesized framework asks for finding





608 proxies for solutions' performances in reducing risk, decision-making in terms of cost  
609 and benefit, and identifying priorities and adaptive pathways from option combinations  
610 in the multi-objective fusion process. The conversations established a fast modeling-  
611 interpreting-remodeling feedback mechanism between the analyst and decision maker,  
612 which helps reduce the complexities and uncertainties encountered in ROA or other  
613 related work (e.g. [Kind et al., 2018](#)), and defining explicit objective ([Raso et al., 2019](#)).  
614 Upon that, incorporating the multi-dimensions of constraints allows for rapidly  
615 minimizing disruption factors, balancing alternative solutions' interpretability, coverage,  
616 and density, and visualizing the applicable pathway.

617 The advantage of our decision-supporting tool in running comprehensive  
618 evaluations for thousand combinations of scenarios within one or a few days and with  
619 moderate demand for input data implies its disadvantage in lack of details at the finer  
620 grid-cell level, e.g., 10m or even smaller grid-cells, or at larger research area. The  
621 second limitation is that the risk assessment in our work considered only the direct  
622 losses caused by inundation while ignoring influences on transportation and other urban  
623 functions and the cascading effect across urban sectors. Moreover, when discussing  
624 cost-benefit analysis, there is a limitation in fully accounting for the social and  
625 environmental benefits. These overlooked aspects lead to a narrow focus on financial  
626 costs, while the broader impacts on communities and ecosystems are neglected. Besides,  
627 cost should not be limited to financial expenditure alone. Human resources, such as the  
628 effort and time required for design and implementation in cross-sector collaboration,  
629 are significant components of cost, particularly when implementing nature-based



630 solutions. Additionally, it is important to consider whether Shanghai has sufficient land  
631 resources available for the expansion of green spaces, as this is a critical factor in the  
632 cost assessment.

633 **In addition, further work needs to discuss the determination the weights of multi-**  
634 **objectives when conducting trade-off analysis.** The balance between robustness and  
635 adaptiveness may vary depending on whether the priority is for immediate, high-impact  
636 actions or long-term sustainability. The weight assigned to each factor should reflect  
637 the specific goals. Besides, scenario discovery was implemented to find the  
638 combination option rather than an optimization algorithm to search for the best optimal  
639 combinations in many alternative options. Future work may apply machine learning  
640 methods, for example genetic algorithms, to solve complex problems of multi-objective  
641 targets under different robust metrics.

## 642 **6 Conclusion**

643 From short to long-term planning, managing inundation risk caused by future  
644 extreme flooding events is challenged by physical, environmental, social-economic and  
645 political uncertainty, etc. This research presents a robust adaptive pathway framework  
646 that integrates robustness and adaptiveness to evaluate flood-control options. The new  
647 framework was tested to carry out the research on robust adaptive pathways regarding  
648 the multi-objective that includes solutions' performance, cost-effectiveness, valid  
649 period, and flexibility under many plausible climate change futures.

650 The results showed that traditional evaluation criteria, such as effectiveness and  
651 cost-efficiency, are insufficient for addressing long-term robustness in climate



652 adaptation options, as they may result in biased and path-dependent outcomes.  
653 Therefore, integrating valid period and flexibility metrics will offer more rational  
654 insights for developing adaptive pathways that can respond to future dynamic changes.  
655 Our case study showed that the high robustness option (e.g., Tun 50 and Tun 70)  
656 performs well under flood control targets and may yield a better BCR(Tun50). While it  
657 possesses low flexibility if the decreased of drainage capacity( $\gamma$ ) induced by future sea  
658 level rising and land subsidence unfold to be not attractive/satisfactory. D+G+Tun30,  
659 achieves the highest score of multi-objective trade-off if both robustness and  
660 adaptiveness are taken into account in long-term planning under uncertainty.

661 This work can not only provide a scientific framework for Shanghai's adaptation  
662 strategic policies planning in coping with extreme weather and climate events under  
663 climate change, but also provide both the theoretical foundation of decision-making  
664 methods and best practices to support the decision-making process for other coastal  
665 megacities to adapt to the changing climate and mitigate the extreme pluvial flood risk.  
666

## 667 **Acknowledgment**

668 This research was funded by the Shanghai Philosophy Social Science Planning  
669 General Project (Grant No. 2024BJC014), and National Natural Science Foundation of  
670 China (Grant No. 42171080 and 42171282).

671

## 672 **Code/Data availability**

673 Case study region data in Shanghai can be found via Shanghai Statistic Yearbook,  
674 Shanghai Flood Control and Drainage Plan (2020-2035). Figures are made in ArcGIS

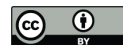

675 Pro 3.0 and Microsoft Excel. Models in this paper are mainly coding in Rust  
676 environment. All the data and software will be opened to the research community upon  
677 acceptance of publication. Data sample can be found via open-accessed figShare via  
678 following URL:

679 Hu, Hengzhi (2023). Robust Adaptive Pathway for Long-term Flood Control  
680 Planning: Urban Delta in Coping with Pluvial Flood Risk under Future Deep  
681 Uncertainty. Multi-criteria trade-off.xlsx. figshare. Dataset.  
682 <https://doi.org/10.6084/m9.figshare.24899340.v1>

### 683 **Author contribution**

684 Hengzhi Hu conceived the study, designed the framework, collected the data and  
685 led the analysis of the result and responsible for writing the manuscript and ensuring its  
686 intellectual content. Qian Ke contributed to the design and implementation of the  
687 decision-making framework, and conduct the manuscript writing and revising. Wei Wu  
688 supported the climate projection of the case study area of Shanghai and identified the  
689 scenario uncertainties. Min Zhang validated the simulation result of pluvial flood and  
690 funding support. Jiahong Wen supervised the project and provided expertise in flood  
691 risk management, and assisted in finalizing the manuscript.

### 692 **Competing interests**

693 The authors declare that they have no competing interests.

### 694 **References**

695 Bartholomew, E., & Kwakkel, J.H. (2020). On considering robustness in the search phase of robust  
696 decision making: a comparison of many-objective robust decision making, multi-scenario

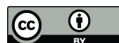

697 many-objective robust decision making, and many objective robust optimization.  
698 Environmental Modelling & Software, 127, 104699.

699 Buurman, J., & Babovic, V. (2016). Adaptation Pathways and Real Options Analysis: An approach  
700 to deep uncertainty in climate change adaptation policies. *Policy and Society*, 35(2), 137-150.

701 Dias, L. F., Aparicio, B. A., Nunes, J. P., Morais, I., Fonseca, A. L., Pastor, A. V., & Santos, F. D.  
702 (2020). Integrating a hydrological model into regional water policies: Co-creation of climate  
703 change dynamic adaptive policy pathways for water resources in southern  
704 Portugal. *Environmental Science & Policy*, 114, 519-532.

705 Du, S, P. Scussolini, P. Ward, et al. (2020). Hard or soft flood adaptation? Advantages of a hybrid  
706 strategy for Shanghai. *Global Environmental Change* 61, 102037.

707 Dottori, F., Mentaschi, L., Bianchi, A., Alfieri, L., & Feyen, L. (2023). Cost-effective adaptation  
708 strategies to rising river flood risk in Europe. *Nature Climate Change*, 13(2), 196-202.

709 Erfani T, Pachos K, Harou JJ. Real-Options Water Supply Planning: Multistage Scenario Trees for  
710 Adaptive and Flexible Capacity Expansion Under Probabilistic Climate Change Uncertainty.  
711 *Water Resources Research*. 2018;54(7):5069-87.

712 Giuliani, M., Castelletti, A. (2016). Is robustness really robust? How different definitions of  
713 robustness impact decision-making under climate change. *Climatic Change*, 135, 409-424.

714 Han, Y., & Mozumder, P. (2021). Building-level adaptation analysis under uncertain sea-level  
715 rise. *Climate Risk Management*, 32, 305.

716 Haasnoot, M., Kwakkel, J.H., Walker, W.E., et al. (2013). Dynamic adaptive policy pathways: A  
717 method for crafting robust decisions for a deeply uncertain world. *Global Environmental*  
718 *Change*, 23, 485-498.

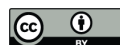

- 719 Haasnoot, M., van Aalst, M., Rozenberg, J., et al. (2020). Investments under non-stationarity:  
720 economic evaluation of adaptation pathways. *Climatic change*, 161(3), 451-463.
- 721 Haasnoot, M., Warren A., Kwakkel J., (2019) Decision making under deep uncertainty: from theory  
722 to practice (p. 405). Springer Nature. Chapter 4.
- 723 Hui P, Tang J, Wang S, et al.(2018). Climate change projections over China using regional climate  
724 models forced by two CMIP5 global models. Part II: projections of future climate. *International*  
725 *Journal of Climatology*, 38:e78-e94.
- 726 Hu, H.Z, Tian, Z., Sun, L.X, et al. (2019). Synthesized trade-off analysis of flood control solutions  
727 under future deep uncertainty: An application to the central business district of Shanghai. *Water*  
728 *research*, 166, 115067.
- 729 Hu, H., Yang, H., Wen, J., Zhang, M., & Wu, Y. (2023). An Integrated Model of Pluvial Flood Risk  
730 and Adaptation Measure Evaluation in Shanghai City. *Water*, 15(3), 602.
- 731 Herman, J.D., Reed, P.M., Zeff, H.B., et al. (2015). How should robustness be defined for water  
732 systems planning under change. *Journal of Water Resources Planning and Management*, 141,  
733 10, 04015012.
- 734 Kwakkel, J.H., Haasnoot, M., Walker, W.E. (2016). Comparing robust decision-making and  
735 dynamic adaptive policy pathways for model-based decision support under deep uncertainty.  
736 *Environmental Modelling & Software*, 86, 168-183.
- 737 Kwakkel J H, Haasnoot M. (2019) Supporting DMDU: A Taxonomy of Approaches and Tools [M].  
738 *Decision Making under Deep Uncertainty*. 355-374.
- 739 Liang P, Ding Y. (2017). The long-term variation of extreme heavy precipitation and its link to  
740 urbanization effects in Shanghai during 1916–2014. *Advances in Atmospheric Sciences*,

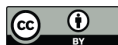

- 741 34(3):321-34.
- 742 Lin, W.B., Sun, Y.M., Nijhuis, S., et al. (2020). Scenario-based flood risk assessment for urbanizing  
743 deltas using future land-use simulation (FLUS): Guangzhou metropolitan area as a case study.  
744 *Science of the Total Environment*, 739: 139899.
- 745 Lempert, R., Kalra, N., Peyraud, S., et al. (2013). Ensuring robust flood risk management in Ho Chi  
746 Minh City. World Bank Policy Research Working Paper, (6465).
- 747 Lempert, R. J. (2003). Shaping the next one hundred years: new methods for quantitative, long-term  
748 policy analysis. Santa Monleica, CA: RAND Corporation, MR-1626-RPC.
- 749 Kim, M. J., Nicholls, R. J., Preston, J. M., & Almeida, G. A. M. (2018). An assessment of the  
750 optimum timing of coastal flood adaptation given sea-level rise using real options analysis.  
751 *Journal of Flood Risk Management*, 12(S2). doi:10.1111/jfr3.12494
- 752 Kind, J. M., Baayen, J. H., & Botzen, W. J. W. (2018). Benefits and Limitations of Real Options  
753 Analysis for the Practice of River Flood Risk Management. *Water Resources Research*, 54(4),  
754 3018-3036.
- 755 Kirshen, P., Caputo, L., Vogel, R. M., et al. (2015). Adapting Urban Infrastructure to Climate Change:  
756 A Drainage Case Study. *Journal of Water Resources Planning and Management*, 141(4).
- 757 Kasprzyk, J. R., Nataraj, S., Reed, P. M., & Lempert, R. J. (2013). Many objective robust decision  
758 making for complex environmental systems undergoing change. *Environmental Modelling &  
759 Software*, 42, 55-71. doi:10.1016/j.envsoft.2012.12.007
- 760 McPhail, C., Maier, H.R., Kwakkel, J.H., et al. (2018). Robustness metrics: How are they calculated,  
761 when should they be used and why do they give different results? *Earth's Future*, 6(2), 169-  
762 191.



- 763 Malekpour, S., & Newig, J. (2020). Putting adaptive planning into practice: A meta-analysis of  
764 current applications. *Cities*, 106.
- 765 Marchau, V. A., Walker, W. E., Bloemen, P. J., et al. (2019). Decision making under deep uncertainty:  
766 from theory to practice (p. 405). Springer Nature.
- 767 Matrosov, E.S., Woods, A.M., & Harou, J.J. (2013). Robust decision making and info-gap decision  
768 theory for water resource system planning. *Journal of Hydrology*, 494, 43-58.
- 769 Quinn JD, Reed PM, Giuliani M, Castelletti A. Rival framings: A framework for discovering how  
770 problem formulation uncertainties shape risk management trade-offs in water resources  
771 systems. *Water Resources Research*. 2017;53(8):7208-33.
- 772 Ramm TD, Watson CS, White CJ. (2018a). Describing adaptation tipping points in coastal flood  
773 risk management. *Computers, Environment and Urban Systems*, 69:74-86.
- 774 Ramm TD, Watson CS, White CJ. (2018b) Strategic adaptation pathway planning to manage sea-  
775 level rise and changing coastal flood risk. *Environmental Science & Policy*, 87:92-101.
- 776 Ranger N, Millner A, Dietz S, et al. (2010). Adaptation in the UK: a decision-making process[J].  
777 Environment Agency, 9: 1-62.
- 778 Raso, L., Kwakkel, J., Timmermans, J., & Panthou, G. (2019). How to evaluate a monitoring system  
779 for adaptive policies: criteria for signposts selection and their model-based evaluation. *Climatic*  
780 *Change*, 153(1-2), 267-283.
- 781 Scussolini P, Tran TVT, Koks E, et al. (2017). Adaptation to sea level rise: a multidisciplinary  
782 analysis for Ho Chi Minh city, Vietnam[J]. *Water Resources Research*, 53: 10841-10857.
- 783 Sun, X., Li, R., Shan, X., et al. (2021). Assessment of climate change impacts and urban flood  
784 management schemes in central Shanghai. *International Journal of Disaster Risk Reduction*,



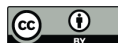

- 785           65, 102563.
- 786   Stanton, M.C.B., & Roelich, K. (2021). Decision making under deep uncertainties: A review of the  
787           applicability of methods in practice. *Technological Forecasting and Social Change*, 171,  
788           120939.
- 789   Shanghai Climate Change Research Center, 2021. Shanghai Climate Change Monitor Bulletin 2022.  
790           Shanghai (in Chinese).
- 791   Shanghai Statistical Bureau, 2021. Shanghai Statistical Yearbook 2021. China Statistical Press,  
792           Beijing. <http://tj.sh.gov.cn/tjnj/sh2017e.htm>.
- 793   Shanghai Municipal Water Authority, 2020. Shanghai Flood Control and Drainage Plan (2020-2035)  
794           [https://swj.sh.gov.cn/ghjhua/20211009/ae9ce5cd33384864b345c75a68e655d4.html?eqid=ad3](https://swj.sh.gov.cn/ghjhua/20211009/ae9ce5cd33384864b345c75a68e655d4.html?eqid=ad31d8020008eed00000000464360c1a)  
795           [1d8020008eed00000000464360c1a](https://swj.sh.gov.cn/ghjhua/20211009/ae9ce5cd33384864b345c75a68e655d4.html?eqid=ad31d8020008eed00000000464360c1a). (in Chinese).
- 796   Tariq, A., Lempert, R.J., Riverson, J., et al. (2017). A climate stress test of Los Angeles' water quality  
797           plans. *Climatic Change*, 144(4), 625-639.
- 798   Walker, W. E., Rahman, S. A., & Cave, J. (2001). Adaptive policies, policy analysis, and  
799           policymaking. *European Journal of Operational Research*, 128(2), 282–289.
- 800   Ward, P. J., Jongman, B., Aerts, J.C.J.H., et al. (2017). A global framework for future costs and  
801           benefits of river-flood protection in urban areas. *Nature climate change*, 7(9), 642-646.
- 802   Wang, J., Yi, S., Li, M., Wang, L., Song, C., 2018. Effects of sea level rise, land subsidence,  
803           bathymetric change and typhoon tracks on storm flooding in the coastal areas of Shanghai. *Sci.*  
804           *Total Environ.* 621, 228-234.
- 805   Werners, S. E., Wise, R. M., Butler, J. R. A., Totin, E., & Vincent, K. (2021). Adaptation pathways:  
806           A review of approaches and a learning framework. *Environmental Science & Policy*, 116, 266-



- 807           275. doi:10.1016/j.envsci.2020.11.003
- 808   Workman, M., Darch, G., Dooley, K., et al. (2021). Climate policy decision making in contexts of
- 809           deep uncertainty-from optimism to robustness. *Environmental Science & Policy*, 120, 127-
- 810           137.
- 811   Xu, K., Zhuang, Y., Yan, X., Bin, L., & Shen, R. (2023). Real options analysis for urban flood
- 812           mitigation under environmental change. *Sustainable Cities and Society*, 93, 104546.
- 813   Yang, T., Yan, X., Huang, X. et al. (2020). Integrated management of groundwater exploitation and
- 814           recharge in Shanghai based on land subsidence control. *Proceedings of the International*
- 815           Association of Hydrological Sciences, 382, 831-836.
- 816   Yang, W., Xu, K., Ma, C., Lian, J., Jiang, X., Zhou, Y., & Bin, L. (2021). A novel multi-objective
- 817           optimization framework to allocate support funds for flash flood reduction based on multiple
- 818           vulnerability assessment. *Journal of Hydrology*, 603, 127144.
- 819   Yang, W., Zhang, J., & Krebs, P. (2023). Investigating flood exposure induced socioeconomic risk
- 820           and mitigation strategy under climate change and urbanization at a city scale. *Journal of*
- 821           *Cleaner Production*, 387, 135929.
- 822   Yin, J., Jonkman, S., Lin, N., Yu, D., Aerts, J., Wilby, R., . . . Wang, J. (2020). Flood Risks in Sinking
- 823           Delta Cities: Time for a Reevaluation? *Earth's Future*, 8(8). doi:10.1029/2020ef001614
- 824   Zhang, M., Dai, Z., Bouma, T.J., et al. (2021). Tidal-flat reclamation aggravates potential risk from
- 825           storm impacts. *Coastal Engineering*, 166, 103868.
- 826   Zhou, Q., Leng, G., Su, J., et al. (2019). Comparison of urbanization and climate change impacts on
- 827           urban flood volumes: Importance of urban planning and drainage adaptation. *Sci Total Environ*,
- 828           658, 24-33.
